# Supplementary material for: Microwave-assisted synthesis of multiply-twinned Au–Ag nanocrystals on reduced graphene oxide for high catalytic performance towards hydrogen evolution reaction
Source: Royal Society of Chemistry journal article supplement (doi:10.1039/c5ta10428a), 2016-01-01
Supplement: c5ta10428a1.pdf [file c5ta10428a1.pdf]

## Supporting Information for

### **Microwave-assisted Synthesis of Multiply-twinned Au–Ag Nanocrystals on Reduced Graphene Oxide for High Catalytic Performance Towards Hydrogen Evolution Reaction**

Yuchen Qin,<sup>a</sup> Xiaoping Dai,<sup>a</sup> Xin Zhang,<sup>\*a</sup> Xingliang Huang,<sup>a</sup> Hui Sun,<sup>a</sup> Daowei Gao,<sup>a</sup> Yanbing Yu,<sup>a</sup>  
Pengfang Zhang<sup>a</sup>, Yan Jiang<sup>a</sup>, Hongying Zhuo<sup>a</sup>, Axiang Jin<sup>a</sup> and Hai Wang<sup>b</sup>

<sup>a</sup>State Key Laboratory of Heavy Oil Processing, China University of Petroleum, Beijing, 102249, P. R. China. E-mail: [zhangxin@cup.edu.cn](mailto:zhangxin@cup.edu.cn)

<sup>b</sup>National Institute of Metrology, Beijing 100013, P. R. China

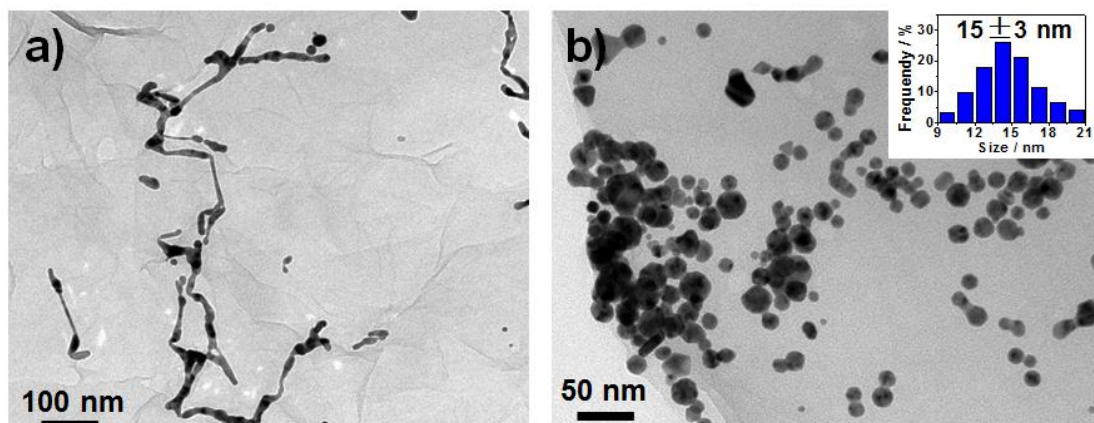

Fig. S1 TEM images of Au-Ag NCs /rGO which prepared in the same reaction system by hydrothermal method at 100 °C for 3 h. (a) DMF solvent and (b) H<sub>2</sub>O solvent.

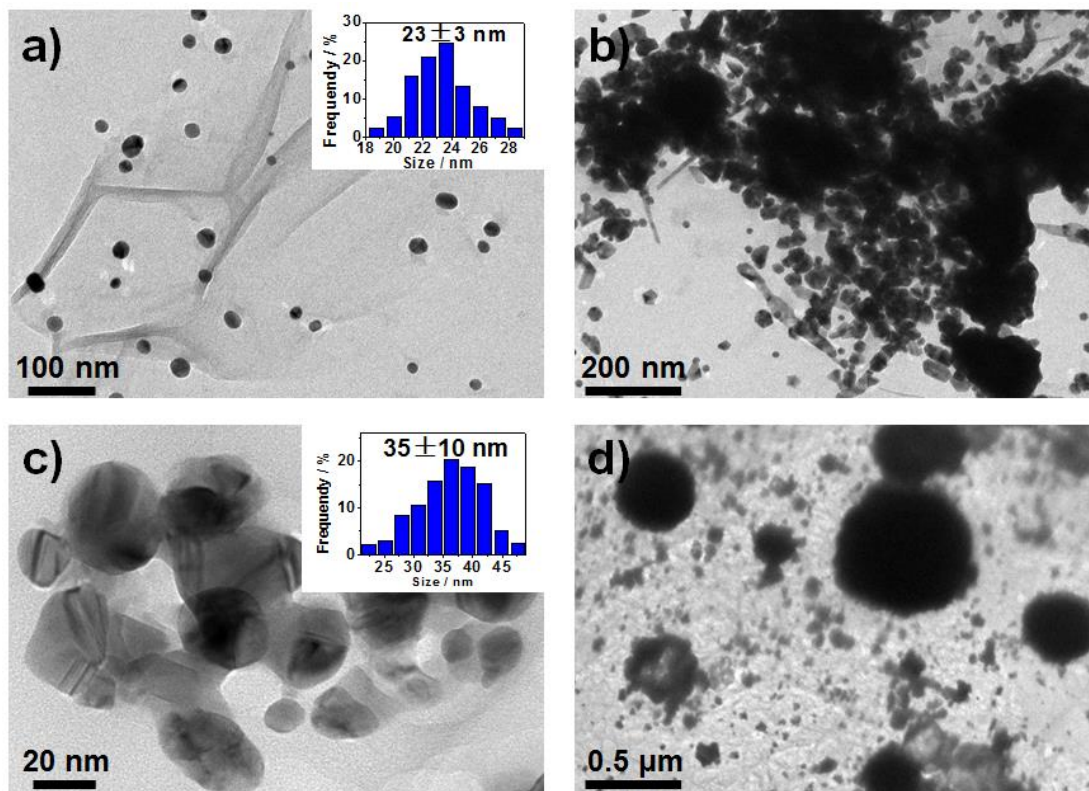

Fig. S2 TEM images (and size-distribution histogram) of Au-Ag NCs /rGO (DMF solvent) prepared in the absence of (a) AA and (b) P123. TEM images of Au-Ag NCs /rGO (H<sub>2</sub>O solvent) prepared using the standard procedure in the absence of (c) AA and (d) P123.

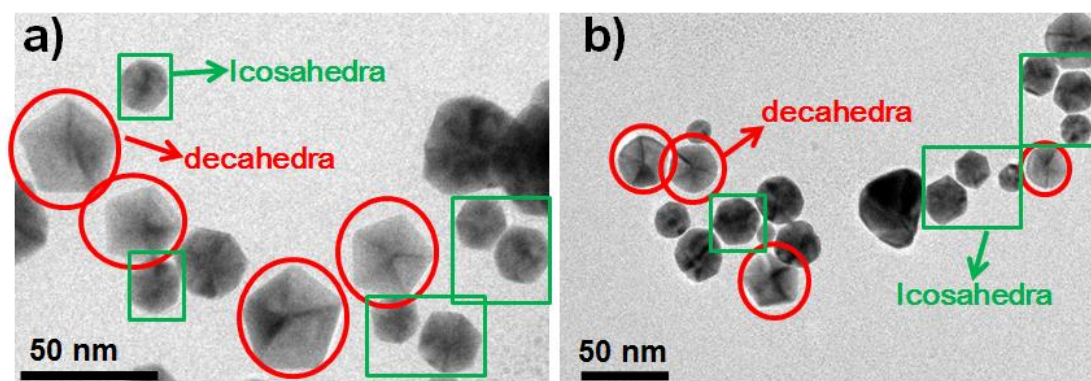

Fig. S3 TEM images of Au-Ag /rGO prepared using the standard procedure for (a) Au-Ag icosahedra /rGO with adding HCl solution (2 mL, 2 mol/L) and (b) Au-Ag decahedra /rGO with adding NaOH solution (2 mL, 0.5 mol/L)

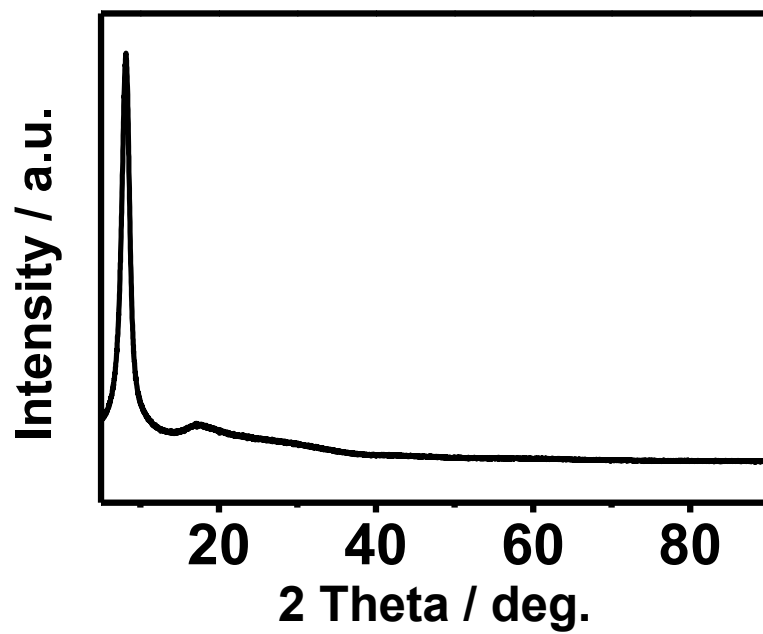

Fig. S4 XRD pattern of GO

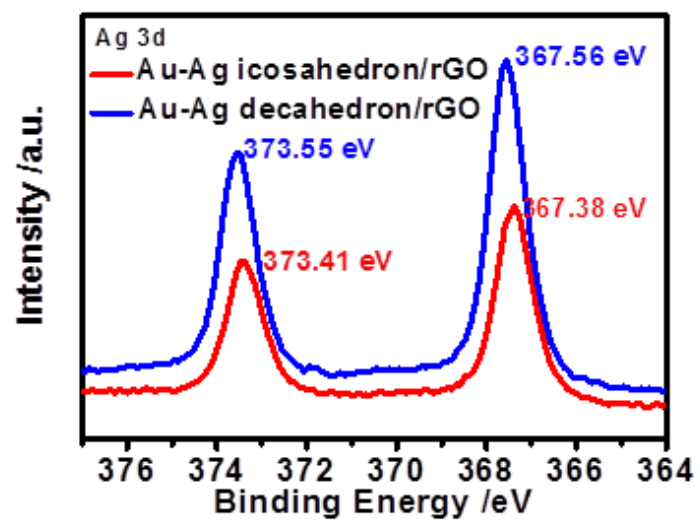

Fig. S5 XPS patterns of the Ag 3d of as-prepared Au–Ag decahedra/rGO and Au–Ag icosahedra/rGO.

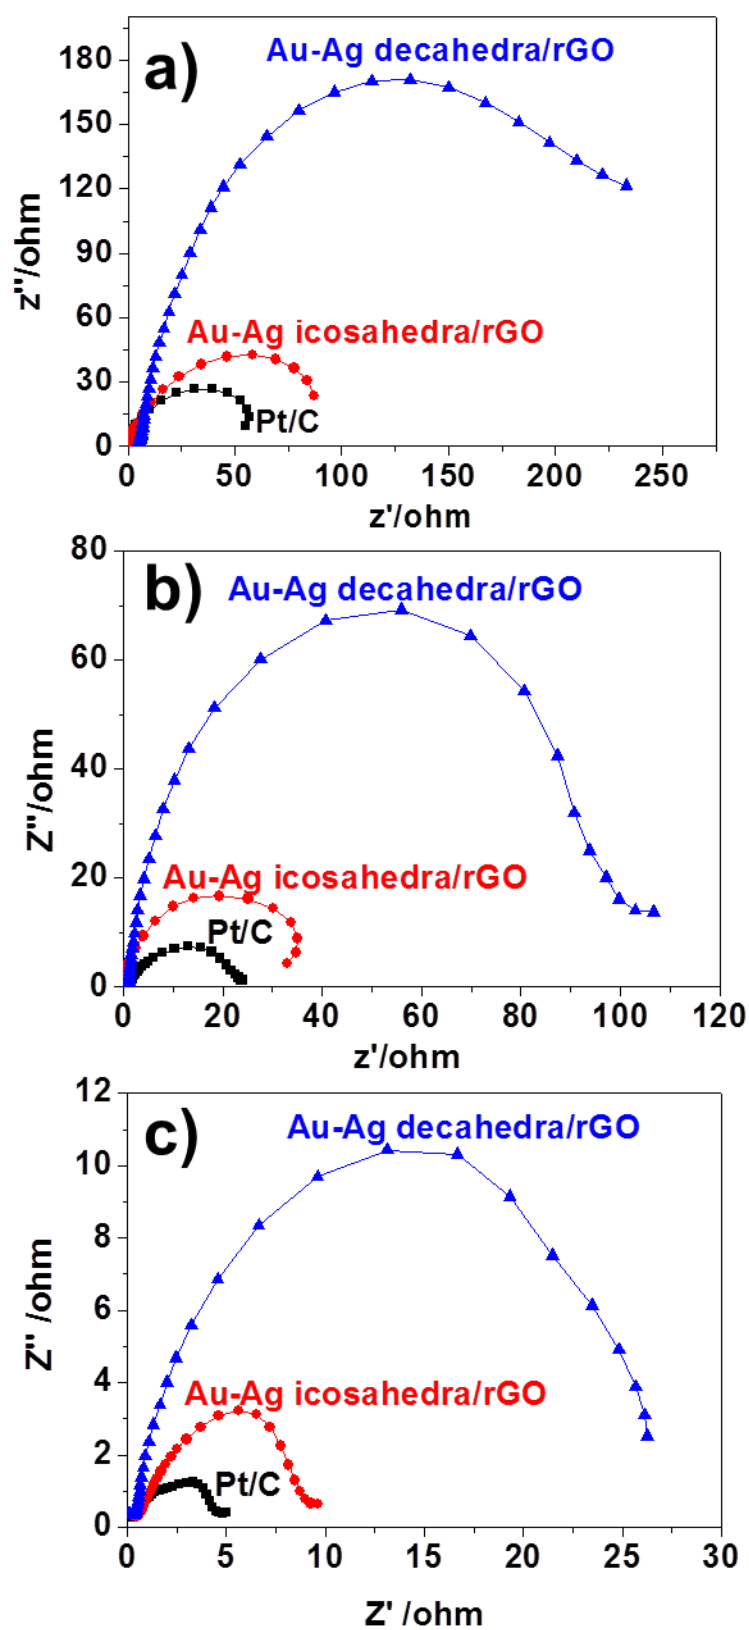

Fig. S6 Nyquist plots of electrochemical impedance spectra (EIS) for various electrocatalysts at overpotential of (a) 20 mV, (b) 40 mV and (c) 60mV.

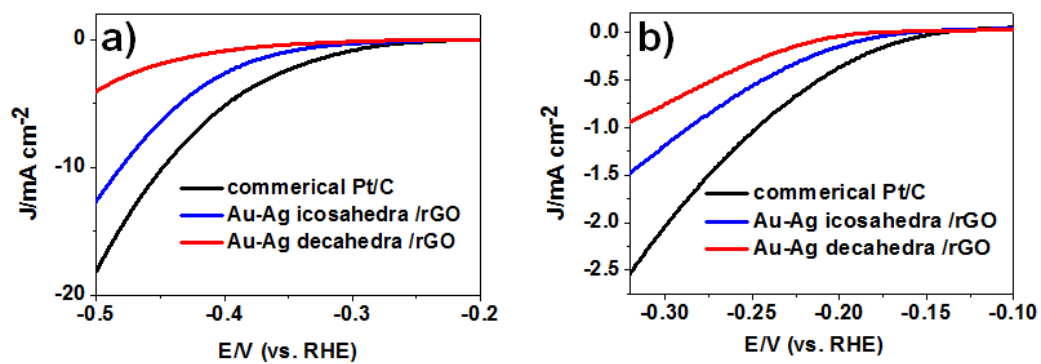

Fig. S7 The HER polarization curves of as-prepared Au–Ag/rGO and commercial Pt/C in (a) phosphate buffer (pH=7) and (b) 0.1 M NaOH (pH=13) solutions.



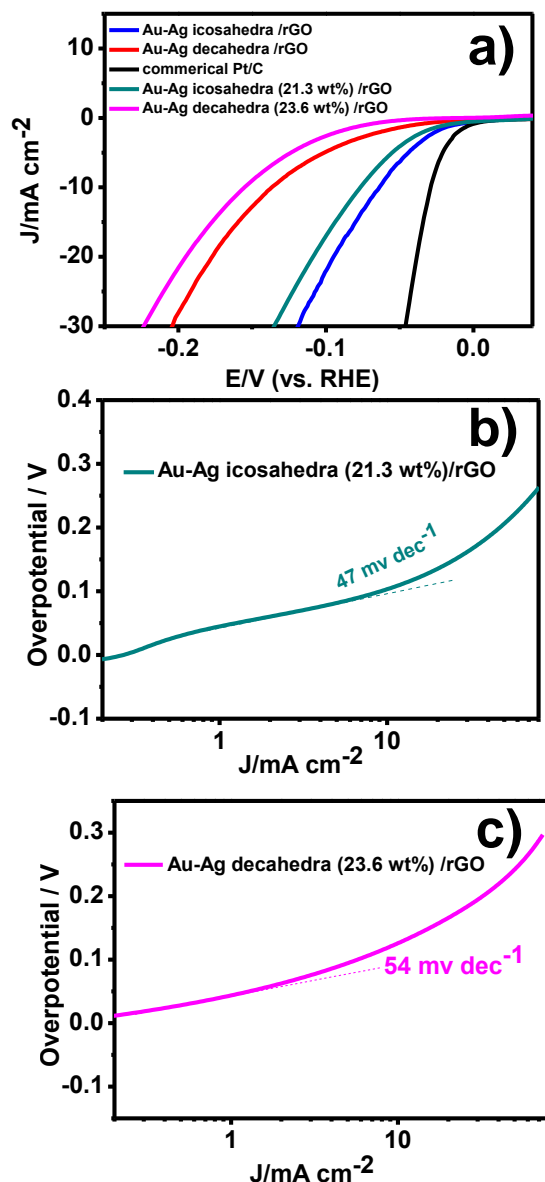

Fig. S8 (a) The HER polarization curves of commercial Pt/C and as-prepared Au-Ag/rGO under different Au-Ag loadings. (b) and (c) Tafel plots recorded on the corresponding catalysts in 0.5 M H<sub>2</sub>SO<sub>4</sub> solution.

For compared with Pt/C (20 wt%) under the similar metal loadings. We decreased the Au-Ag loadings and prepared Au-Ag decahedra/rGO (Au-Ag loading: 23.6 wt%) and Au-Ag icosahedra/rGO (Au-Ag loading: 21.3 wt%). As Fig. S8 shown, the electrocatalytic activity of Au-Ag icosahedra/rGO (21.3 wt%) was a little lower than that of Au-Ag icosahedra/rGO (50.6 wt%) and the Tafel slope of 47  $\text{mv dec}^{-1}$  was a little larger than that of Au-Ag icosahedra/rGO (39  $\text{mv dec}^{-1}$ ). When the Au-Ag decahedra loadings decreased to 23.6 wt%, the electrocatalytic performance was also lower than that of Au-Ag decahedra/rGO (52.3 wt%) and the Tafel slope of 54  $\text{mv dec}^{-1}$  was closed to that of Au-Ag decahedra/rGO (52.3 wt%). It demonstrated that the Au-Ag loadings of Au-Ag/rGO hybrids has a small effect on the electrocatalytic activity for HER.

Table S1. The specific surface area and pore volume of Au–Ag NCs/rGO

| Sample                  | $S_{\text{BET}}$<br>( $\text{m}^2 \text{g}^{-1}$ ) | $V_{\text{pore}}$<br>( $\text{cm}^3 \text{g}^{-1}$ ) |
|-------------------------|----------------------------------------------------|------------------------------------------------------|
| rGO                     | 46.3                                               | 0.14                                                 |
| Au-Ag<br>decahedra/rGO  | 83.4                                               | 0.26                                                 |
| Au–Ag<br>icosahedra/rGO | 89.9                                               | 0.33                                                 |

“Nitrogen physisorption measurements were performed at liquid-nitrogen temperature with a Micromeritics TriStar 3020 apparatus. Prior to the measurements, all samples were vacuum-degassed at 373 K for 12 h. The total surface area was determined by the BET method. The pore size distribution profile and the mesopore volume were obtained by the BJH method with the  $\text{N}_2$  desorption isotherm.

From Table S1, we could found that the specific surface area ( $S_{\text{BET}}$ ) of Au-Ag decahedra/rGO and Au–Ag icosahedra/rGO were 83.4 and 89.9  $\text{m}^2 \text{g}^{-1}$ , which were similar to the  $S_{\text{BET}}$  of rGO ( $\sim 46.3 \text{ m}^2 \text{g}^{-1}$ ). The pore volume of rGO and Au-Ag NCs/rGO were all small.

Table S2. Performance of Au-based catalyst for HER and several results from previous published works

| Ref.             | Catalyst                    | Scan rate (mV/s) | Solution                                 | Temperature (°C)        | Tafel slope ( mV dec <sup>-1</sup> ) |
|------------------|-----------------------------|------------------|------------------------------------------|-------------------------|--------------------------------------|
| <b>This work</b> | <b>Au-Ag icosahedra/rGO</b> | <b>10</b>        | <b>0.5 M H<sub>2</sub>SO<sub>4</sub></b> | <b>Room temperature</b> | <b>39</b>                            |
| <b>1</b>         | <b>Pd–Au/CFP</b>            | <b>5</b>         | <b>0.5 M H<sub>2</sub>SO<sub>4</sub></b> | <b>Room temperature</b> | <b>47</b>                            |
| <b>2</b>         | <b>Au NPs/rGO</b>           | <b>5</b>         | <b>0.5 M H<sub>2</sub>SO<sub>4</sub></b> | <b>Room temperature</b> | <b>39.2</b>                          |
| <b>3</b>         | <b>NiAu/Au</b>              | <b>2</b>         | <b>0.5 M H<sub>2</sub>SO<sub>4</sub></b> | <b>Room temperature</b> | <b>36</b>                            |

## References

1. Z. Zhuang, F. Wang, R. Naidu and Z. Chen, *J. Power Sources*, 2015, **291**, 132-137.
2. G. Darabdhara, M. A. Amin, G. A. M. Mersal, E. M. Ahmed, M. R. Das, M. B. Zakaria, V. Malgras, S. M. Alshehri, Y. Yamauchi, S. Szunerits and R. Boukherroub, *J. Mater. Chem. A*, 2015, **3**, 20254-20266.
3. H. Lv, Z. Xi, Z. Chen, S. Guo, Y. Yu, W. Zhu, Q. Li, X. Zhang, M. Pan, G. Lu, S. Mu and S. Sun, *J. Am. Chem. Soc.*, 2015, **137**, 5859-5862.
